# Supplementary material for: Study on the affinity sites of cadmium's binding to ligands by thermodynamics and nuclear magnetic resonance spectroscopy
Source: Royal Society of Chemistry journal article supplement (doi:10.1039/d3ay02253f), 2024-01-01
Supplement: d3ay02253f1.pdf [file d3ay02253f1.pdf]

## NATIVE English Editing

<https://www.nativeeee.com>

Address: 18 East Jiuxianqiao Road,

Chaoyang District, Beijing, China

Phone: +861064125081

10<sup>th</sup> March, 2024

### STATEMENT OF EDITING

This is to certify that the following document has been checked and corrected for proper English language, grammar, punctuation, spelling, and overall style by one or more of the highly-qualified, native English-speaking editors at Native English Editing.

Native English Editing provides editing and proofreading of scientific manuscripts for submission to peer-reviewed journals.

Manuscript title: Exploration of the affinity sites of cadmium binding to ligands by thermodynamics and nuclear magnetic resonance spectroscopy

Date Issued: 10<sup>th</sup> March, 2024

Certificate Verification Key: 2024030749525548

Yours truly,



Graeme Brown

Co-owner Native English Editing

Email: [publish@nativeeee.com](mailto:publish@nativeeee.com)

Contact information of Beijing sales department in China:

Address: 18 East Jiuxianqiao Road, Chaoyang District, Beijing, China

Phone: +861064125081

Fax: +861064125081

Contact information of Australian editorial department:

Address: 42D Melrose Street, Parkdale Vic 3195, Australia

Phone: +61417560758
