# Supplementary material for: Study on the affinity sites of cadmium's binding to ligands by thermodynamics and nuclear magnetic resonance spectroscopy
Source: Royal Society of Chemistry journal article supplement (doi:10.1039/d3ay02253f), 2024-01-01
Supplement: d3ay02253f2.pdf [file d3ay02253f2.pdf]

## Symbols

|            |                      |
|------------|----------------------|
| K          | affinity constant    |
| $\Delta H$ | enthalpy change      |
| $\Delta S$ | entropy change       |
| $\Delta G$ | Gibbs free energy    |
| N          | stoichiometric ratio |
| $^1H$      | hydrogen proton      |
| $\delta$   | chemical shift       |

## Abbreviations

|               |                                                 |
|---------------|-------------------------------------------------|
| Cd( II )      | cadmium                                         |
| Cys           | cysteine                                        |
| GSH           | glutathione                                     |
| HEPES         | 4-hydroxyethylpiperazine<br>ethanesulfonic acid |
| MES           | 2-(N-Morpholino) ethanesulfonic<br>acid hydrate |
| NMR           | nuclear magnetic resonance<br>spectroscopy      |
| 1D $^1H$ -NMR | One-dimensional hydrogen NMR<br>spectroscopy    |
| IIPs          | ion imprinted polymers                          |
| ITC           | isothermal titration calorimetry                |
